# Supplementary material
Source: publisher site journal article supplement (https://www.dovepress.com/article/565211)

**Supplementary figure 1**Skin ultrasound examination images of the alopecia area: a few HA remains in the alopecia area with posterior acoustic reinforcement.

**
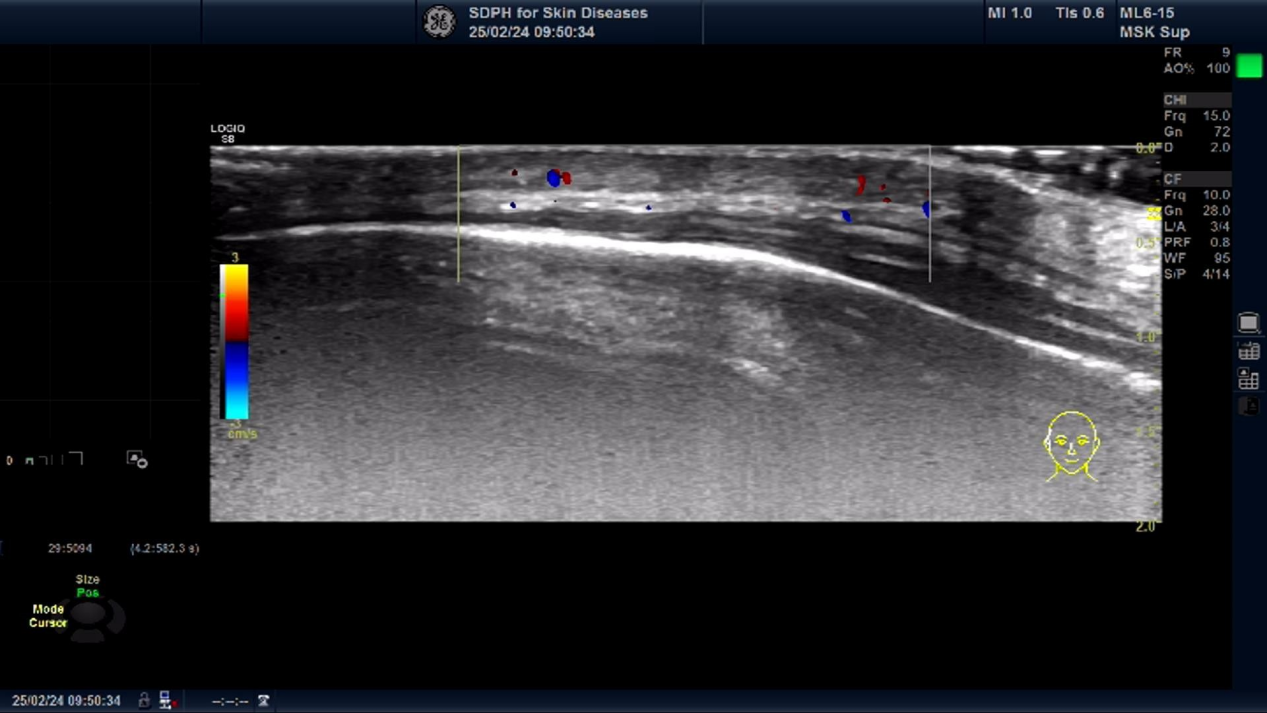
**

**Supplementary figure 2**Therapeutic timeline.


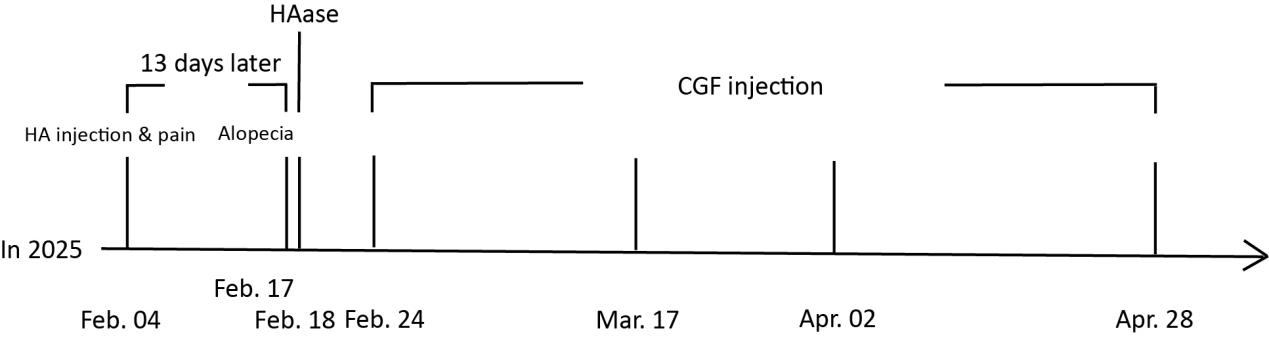

Supplement: Supplementary file 1 [file 565211%20Revised%20Supplementary%20Figures%201-2.docx]
